# Supplementary material for: Evaluation of a Virus-like Nanoparticle Porcine Circovirus Type-2 (PCV2) Capsid Protein Fused with the Pig Immunoglobulin Fc Fragment as a Novel Vaccine Candidate against PCV2 in Mice
Source: MDPI journal article supplement (doi:10.3390/vaccines9101128), 2021-10-03
Supplement: s1 [file s1]

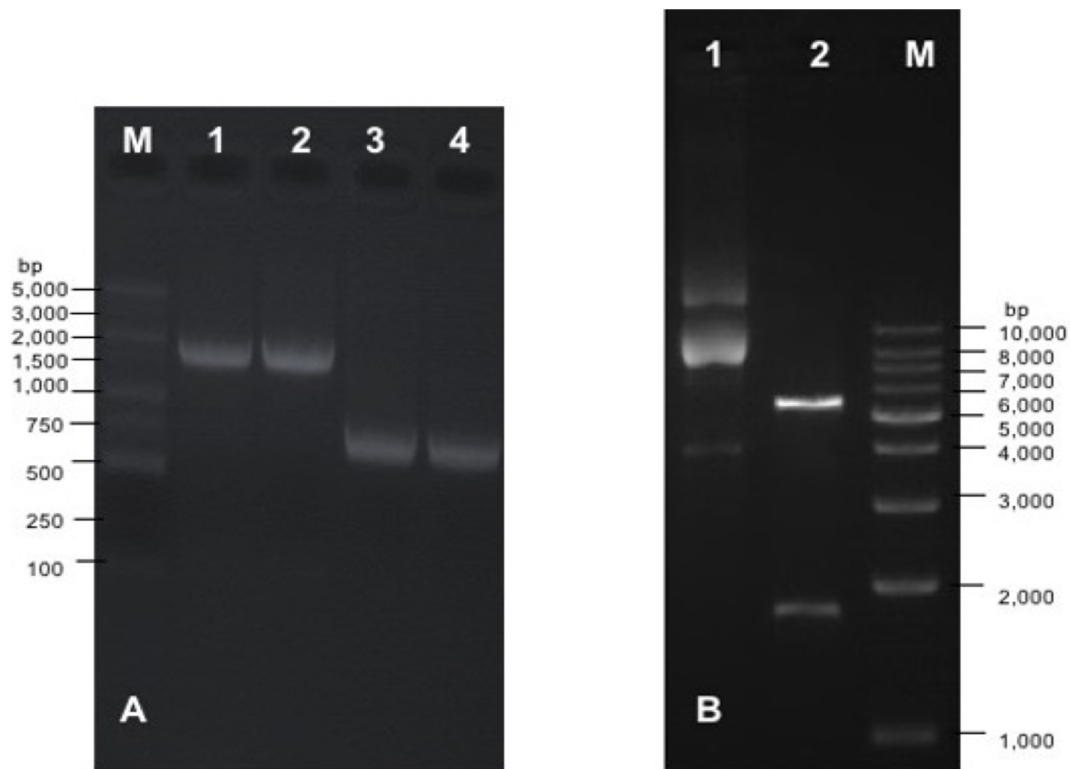

**Figure S1. Construction of the recombinant plasmid pEM-PCFP.** DNA electrophoresis analysis of PCFP gene PCR product and the pEM-PCFP plasmid. (A) PCV2 Capsid ( $\Delta$ 1-41aa)-pFc gene was confirmed by PCR. M, DNA marker (1kb DNA ladder); Lane 1-2, PCFP gene PCR product; Lane 3-4, truncated PCV2 capsid gene PCR product. (B) The recombinant plasmids were extracted and digested with *Nhe*I/*Hind*III enzymes. M, DNA Marker 5000; Lane 1, full-length of pEM-PCFP plasmids; Lane 2, The recombinant plasmids pEM-PCFP were cleaved by restriction enzymes *Nhe*I and *Hind*III.

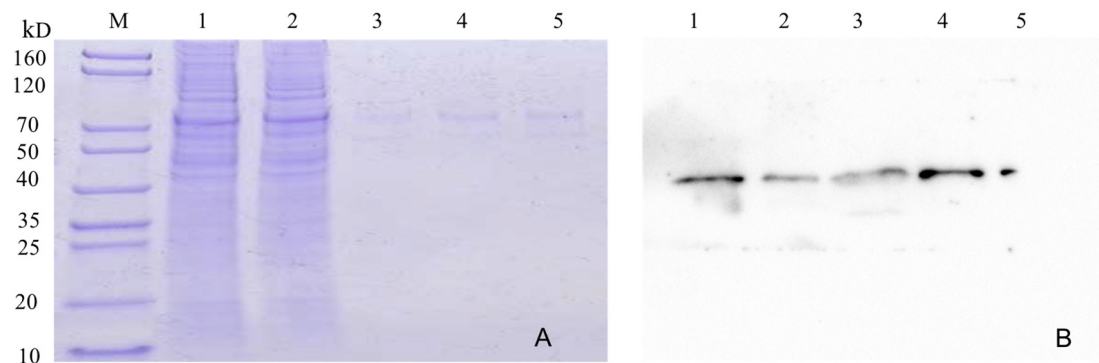

**Figure S2. Purification of PCFP fusion protein expressed in HEK 293F cells by a Protein A affinity chromatography column.** Cell lysates of HEK293F cells transfected with the recombinant plasmids and purified PCFP proteins were run on a 12.5% polyacrylamide gel under denaturing conditions. Gel was stained with Coomassie blue for SDS-PAGE analysis (A) and transferred to a nitrocellulose membrane for western blot analysis using anti-capsid antibody (B). M, protein marker; Lane 1 to 5, cell lysates, flow through, elution fraction 1, elution fraction 2, elution fraction 3, respectively.

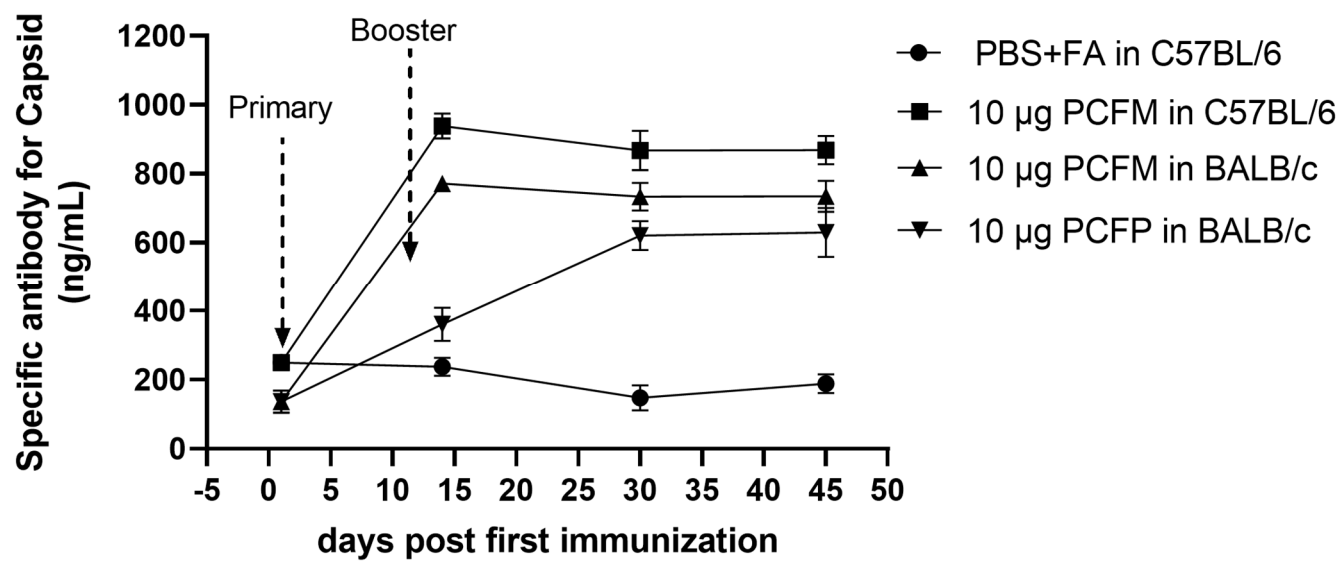

**Figure S3.** Kinetics of the specific antibody titer for PCV2 capsid in the serum from mice immunized with PCFM. The titer of PCV2b-capsid-specific IgG in serum from immunized mice was measured by ELISA.
